# Supplementary material
Source: PubMed Central journal article supplement (PMC4168370)
Supplement: gf454sup_10-1055-s-0031-1298390.pdf [file gf454sup_10-1055-s-0031-1298390.pdf]

# Prävalenz, Trend und Determinanten des Gestationsdiabetes in Deutschland

## Prevalence, Trend and Determining Factors of Gestational Diabetes in Germany

### Autoren

C. Huy<sup>1</sup>, A. Loerbroks<sup>1</sup>, A. Hornemann<sup>2</sup>, S. Röhrig<sup>1</sup>, S. Schneider<sup>1</sup>

### Institute

<sup>1</sup> Mannheimer Institut für Public Health, Sozial- und Präventivmedizin, Universität Heidelberg, Mannheim  
<sup>2</sup> Klinik für Gynäkologie und Geburtshilfe, Universitätsmedizin Mannheim, Mannheim

### Schlüsselwörter

- Epidemiologie
- Gestationsdiabetes
- Screening

### Key words

- epidemiology
- gestational diabetes
- screening

### Zusammenfassung

**Fragestellung:** Die tatsächliche Prävalenz des Gestationsdiabetes ist hierzulande weitgehend unbekannt. Die Ziele der vorliegenden Studie waren daher, die Prävalenz des Gestationsdiabetes abzuschätzen sowie den zeitlichen Trend darzustellen und Determinanten zu identifizieren.

**Material und Methodik:** Es wurden Prävalenzberechnungen an 2 repräsentativen Datensätzen vorgenommen: an der registerbasierten deutschen Perinatalstatistik (n=650232) sowie an den maternalen Selbstberichten aus dem Kinder- und Jugendgesundheitsurvey (KiGGS; n = 15 429). Unterschiede zwischen Prävalenzwerten wurden mit  $\chi^2$ - bzw. Trendtests beurteilt und Determinanten mittels logistischer Regression identifiziert.

**Ergebnisse:** Laut Perinatalstatistik lag im Jahr 2010 bei 3,7% der Schwangeren in Deutschland ein Gestationsdiabetes vor. Kumuliert für die Jahre 2001–2006 ergab sich aus dieser Datenquelle ein Wert von 1,9%, der sich signifikant von der auf Basis der KiGGS-Daten für diesen Zeitraum berechneten Prävalenz unterschied (5,3%; 95%-Konfidenzintervall: 4,6–6,1%). In beiden Datensätzen ist ein ansteigender Trend in der Gestationsdiabetesprävalenz zu beobachten ( $p < 0,001$ ). Das Gestationsdiabetesrisiko war vor allem mit dem Alter, dem BMI und dem Sozialstatus der Schwangeren sowie mit Mehrlingsschwangerschaften assoziiert.

**Schlussfolgerung:** Das Fehlen aussagekräftiger Screening-Studien an repräsentativen Kollektiven erschwert eine fundierte Schätzung der wahren Gestationsdiabetesprävalenz. Der ansteigende Trend in der Gestationsdiabetesprävalenz könnte sich vor dem Hintergrund der projizierten Zunahme wesentlicher Risikofaktoren (z.B. maternales Alter, Adipositas) weiter fortsetzen. Unsere Berechnungen unterstützen die aktuellen Konsensus-Empfehlungen hinsichtlich eines einheitlichen Gestationsdiabetes-Screenings.

### Abstract

**Purpose:** The true prevalence of gestational diabetes in Germany is unknown. Thus, the study's purposes were to estimate the prevalence of gestational diabetes as well as to describe the temporal prevalence trend and to identify determinants. **Material and Methods:** We calculated prevalence estimates based on two datasets: the register-based German perinatal statistic (n=650232) and the maternal self-reports from the German children and youth health survey (KiGGS; n = 15 429). Differences between prevalence estimates were analysed using  $\chi^2$  and trend tests, and determinants were identified using logistic regression.

**Results:** According to the perinatal statistic, gestational diabetes was present in 3.7% of pregnant women in Germany in 2010. The prevalence across the years 2001 to 2006 was estimated at 1.9% which differed significantly from the prevalence estimate derived from the KiGGS dataset for the same period of time (5.3%; 95% confidence interval: 4.6–6.1%). Both datasets show an increasing trend of gestational diabetes ( $p < 0.001$ ). The risk for gestational diabetes was mainly associated with age, BMI and social class of pregnant women as well as with multiple pregnancies.

**Conclusion:** The lack of significant screening studies among representative samples hampers a sound estimation of the true prevalence of gestational diabetes in Germany. The increasing trend in gestational diabetes might continue due to the projected increase of important risk factors (e.g., maternal age, obesity). Our analyses support the current consensus recommendations regarding standardised gestational diabetes screening.

**eingereicht** 20.10.2011  
**revidiert** 2.2.2012  
**akzeptiert** 29.2.2012

### Bibliografie

**DOI** <http://dx.doi.org/10.1055/s-0031-1298390>  
 Geburtsh Frauenheilk 2012; 72: 1–5 © Georg Thieme Verlag KG Stuttgart · New York · ISSN 0016-5751

### Korrespondenzadresse

**Mrs. Christina Huy, M. Sc., Dipl.-Inform. Med.**  
 Universität Heidelberg  
 Mannheimer Institut für Public Health, Sozial- und Präventivmedizin  
 Ludolf-Krehl-Straße 7–11  
 68167 Mannheim  
[christina.huy@medma.uni-heidelberg.de](mailto:christina.huy@medma.uni-heidelberg.de)

## Einleitung

Der Gestationsdiabetes mellitus gehört zu den häufigsten endokrinen Stoffwechselerkrankungen in der Schwangerschaft und geht mit erhöhten Risiken sowohl für die Schwangere als auch für den Feten einher. Zu den Risiken gehören z.B. diabetische Fetopathie und Makrosomie, vorzeitige Wehentätigkeit mit nachfolgender Frühgeburt aufgrund einer Polyhydramnie, geburtsmechanische Probleme bei makrosomen Kindern sowie vermehrte (bspw. kardiovaskuläre) Fehlbildungen [1,2]. Solche Komplikationen können langwierige Behandlungen bei Schwangeren und Neugeborenen nach sich ziehen. Daher ist eine frühzeitige Diagnose und Therapie des Gestationsdiabetes notwendig, um die Risiken zu minimieren und hohe Behandlungskosten zu vermeiden.

Vor diesem Hintergrund wird die herausragende medizinische und gesundheitsökonomische Bedeutung einer Früherkennung des Gestationsdiabetes deutlich. Da der Blutzuckertest während der Schwangerschaft bis zur Fertigstellung dieser Studie noch nicht in den Mutterschaftsrichtlinien als Screening-Test aufgenommen war, ist er bislang nicht bei allen Schwangeren durchgeführt worden. Somit sind die tatsächliche Prävalenz des Gestationsdiabetes und der Interventionsbedarf weitgehend unbekannt. Der Gemeinsame Bundesausschuss (GBA) hat allerdings am 15.12.2011 entschieden, dass die Testung auf Gestationsdiabetes eine Kassenleistung wird, weshalb – vorbehaltlich der Prüfung durch das Bundesministerium für Gesundheit – mit einer Aufnahme in die Mutterschaftsrichtlinien zu rechnen ist [3].

Die Ziele der vorliegenden Studie waren, auf Basis von 2 unterschiedlichen Datensätzen die aktuelle Prävalenz des Gestationsdiabetes und den zeitlichen Trend in Deutschland darzustellen. Diese Daten bilden die Grundlage für die Ermittlung des gegenwärtigen und die Abschätzung des zukünftigen Diagnose- und Therapiebedarfs in der täglichen Praxis. Zudem werden maternale Charakteristika präsentiert, die mit dem Gestationsdiabetes assoziiert sind und somit Ansatzpunkte für zielgruppenorientierte Interventionsmaßnahmen bieten.

## Material und Methodik

Die Prävalenzberechnungen basieren auf 2 repräsentativen Datensätzen aus Deutschland. Hierzu wurde zum einen die deutsche Perinatalstatistik der Jahre 2001 bis 2010 (aktuell letztverfügbarer Jahrgang) genutzt [4]. Dabei handelt es sich um die umfangreichste registerbasierte Datenbasis zum Gestationsdiabetes, die über 99% aller Klinikgeburten in Deutschland repräsentiert [5]. Die Anzahl der Hausgeburten bewegt sich hierzulande auf einem konstant niedrigen Niveau von etwa 1–2% aller Geburten und wird in den Perinataldaten nicht erfasst. Die Perinatalstatistik erfasst Fälle von Gestationsdiabetes, die im Mutterpass als Schwangerschaftsrisiko oder als Indikation für einen stationären Aufenthalt codiert wurden. Aus den Perinatalstatistiken der einzelnen Jahrgänge (Kohorten) lassen sich zeitliche Trends berechnen. Darüber hinaus hatten die Autoren im Rahmen einer vom GBA beauftragten Sonderauswertung Zugang zum vollständigen Perinataldatensatz des Jahres 2006. Mittels der Informationen zu maternalen Risikofaktoren und demografischen Charakteristika der Mütter zum Zeitpunkt der Schwangerschaft konnten Determinanten des Gestationsdiabetes bestimmt werden.

Des Weiteren wurden Daten des Kinder- und Jugendgesundheits-survey (KiGGS) ausgewertet. Der KiGGS stellt eine bevölkerungs-

repräsentative Befragung von mehr als 15 000 deutschen Kindern und Jugendlichen im Alter bis 17 Jahren dar (Geburtsjahrgänge 1985–2006). Die Eltern dieser Kinder (in 90% der Fälle waren dies die Mütter) wurden im Rahmen des KiGGS gefragt, ob bei ihnen während der Schwangerschaft ein Schwangerschaftsdiabetes (oder erstmals ein Diabetes mellitus anderen Typs) festgestellt wurde [6]. Laut der zum Zeitpunkt der Erhebung geltenden Definition der AG „Diabetes und Schwangerschaft“ in der Deutschen Diabetes-Gesellschaft (DDG) wurden diese Fälle als Gestationsdiabetes codiert [1].

Die Prävalenz wurde als prozentualer Anteil an Müttern mit Gestationsdiabetes unter allen befragten Müttern der besagten Jahrgänge berechnet. Die Prävalenzschätzer für den KiGGS werden standardgemäß mit einem 95%-Konfidenzintervall (95%-KI) dargestellt, da es sich beim KiGGS um Stichprobendaten handelt. Die Perinatalstatistik stellt hingegen eine Vollerhebung von weit über 99% aller Geburten dar, weswegen auf die Darstellung von 95%-KIs verzichtet werden kann. Unterschiede zwischen einzelnen Prävalenzwerten wurden mit  $\chi^2$ - bzw. Trendtests beurteilt. Assoziationen mit dem Gestationsdiabetes wurden für die Daten der Perinatalstatistik mittels einer logistischen Regressionsanalyse untersucht. Eine diesbezüglich weiterführende Auswertung der Daten des KiGGS war hingegen aufgrund fehlender Informationen zu zentralen Risikofaktoren zu Beginn der Schwangerschaft nicht möglich. Die Analysen erfolgten mit der Statistiksoftware SAS 9.2 (SAS Institute Inc., Cary, USA) und PASW 18 (SPSS Inc., Chicago, USA).

## Ergebnisse

Gemäß den aktuellsten offiziellen Registerdaten aus der Perinatalstatistik lag im Jahr 2010 bei 3,7% der Schwangeren (23 872 von 650 232 Frauen) ein Gestationsdiabetes vor (● **Abb. 1**). Kumuliert für die Jahre 2001–2006 errechnet sich für die registerbasierten Daten eine Prävalenz von 1,9%. Dieser Wert unterscheidet sich signifikant von der auf Basis der KiGGS-Daten berechneten Prävalenz derjenigen Mütter, deren Kinder in den Jahren 2001–2006 geboren wurden ( $p < 0,001$ ). In diesem Zeitraum berichteten 5,3% (95%-KI: 4,6–6,1%) der Mütter, dass bei ihnen damals ein Gestationsdiabetes vorlag (156 von 2970 Frauen; ● **Abb. 2**). Sowohl die deutsche Perinatalstatistik als auch die Daten des KiGGS zeigen einen ansteigenden Trend in der Gestationsdiabetesprävalenz ( $p < 0,001$ ). Dabei liegen die Werte des KiGGS deutlich über denen der Perinatalstatistik (● **Abb. 1** und **2**).

Die multiple logistische Regressionsanalyse auf Basis der Perinatalstatistik (● **Tab. 1**) zeigt, dass das Gestationsdiabetesrisiko nahezu linear mit dem Alter der Schwangeren ansteigt. So ist das Risiko bei Schwangeren über 35 Jahre mehr als 4-mal so hoch im Vergleich zu Schwangeren unter 20 Jahren. Ein signifikanter stetiger Zusammenhang zeigt sich auch zwischen der Auftretenswahrscheinlichkeit eines Gestationsdiabetes und dem Body-Mass-Index (BMI) zu Beginn der Schwangerschaft. Frauen mit einem initialen BMI von über 35 kg/m<sup>2</sup> haben demnach ein fast 5-fach erhöhtes Risiko im Vergleich zu normalgewichtigen Frauen. Bei Mehrlingsschwangerschaften ist das Risiko, an Gestationsdiabetes zu erkranken, ebenso erhöht. Zu den Risikogruppen zählen des Weiteren Schwangere mit niedrigem Sozialstatus. Weitere Assoziationen zeigt ● **Tab. 1**.

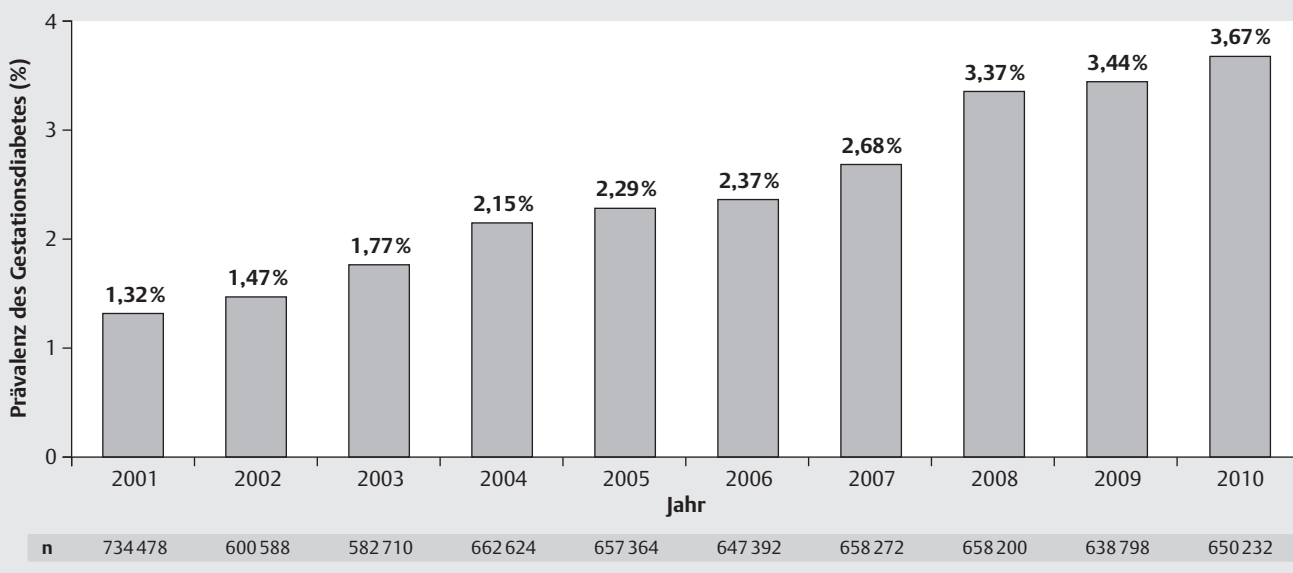

Abb. 1 Prävalenz des Gestationsdiabetes auf Basis der deutschen Perinatalstatistik (%) [4].

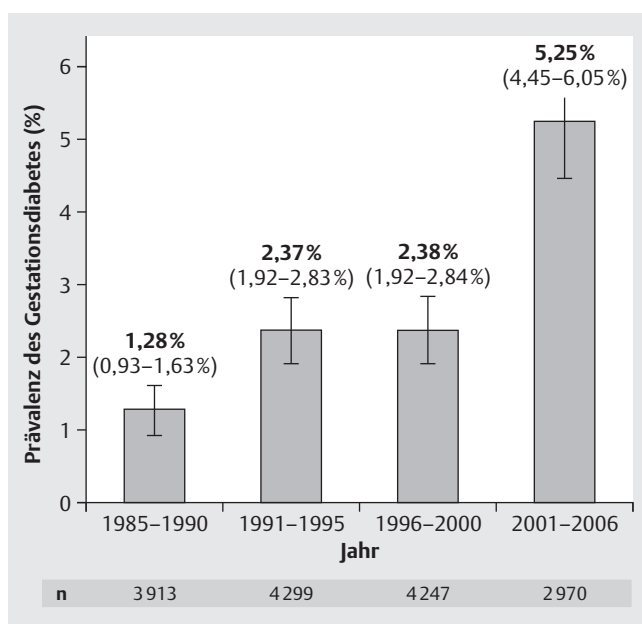

Abb. 2 Prävalenz des Gestationsdiabetes in Deutschland auf Basis der maternalen Selbstberichte im Kinder- und Jugendgesundheitssurvey (% und 95%-Konfidenzintervall) [6].

## Diskussion

Das Fehlen aussagekräftiger Studien an repräsentativen Kollektiven erschwert eine fundierte Schätzung der wahren Gestationsdiabetesprävalenz in Deutschland erheblich [7]. Im Idealfall würde ein flächendeckendes Screening auf Gestationsdiabetes, an dem alle schwangeren Frauen teilnehmen, den wahren Prävalenzwert liefern. Allerdings liegen für Deutschland keine solchen Vollerhebungen vor, insofern mussten in der vorliegenden Untersuchung alternative Methoden angewendet werden, um die Prävalenz zu schätzen. Die Prävalenz aus der deutschen Perinatalstatistik – mit 3,7% für den aktuell letztverfügbaren Jahrgang –

liegt unterhalb der Selbstangaben aus dem KiGGS, die bereits für die Jahre 2001 bis 2006 zu einem Wert von 5,3% führten. Dass Selbstangaben zu deutlich höheren Werten als registerbasierte Daten führen, zeigten auch 2 Studien aus den USA: Hierbei ergaben sich Prävalenzen von 9,0 und 8,7% bei Selbstauskunft vs. jeweils 4,8% bei ärztlich validierten und zentral registrierten Diagnosen, was Abweichungen von 4,2 bzw. 3,9 Prozentpunkten bedeutet [8,9]. Der Vergleich der in der vorliegenden Studie genutzten Datenquellen deutet darauf hin, dass offensichtlich nicht bei allen Fällen die Diagnose Gestationsdiabetes von den Geburtskliniken im Erfassungsprogramm eingegeben wird. Dies entspricht der klinischen Erfahrung.

Eine Ursache für die defizitäre Datenlage zum Gestationsdiabetes in Deutschland ist zum einen die nicht standardisierte Screening-Praxis. So verzichten viele Gynäkologen z. B. oft auf ein Screening oder führen ein solches vorrangig bei Risikogruppen durch, während andere Ärzte einen großen Teil ihrer Patientinnen auf Gestationsdiabetes untersuchen. Dabei wird der orale Glukosetoleranztest (oGTT) [2] oft als individuelle Gesundheitsleistung (IGeL) angeboten, was eine selektive Inanspruchnahme begünstigt. So wird dieses Angebot möglicherweise gerade von Patientinnen mit unterdurchschnittlichem Risiko wahrgenommen. Eine 2. Ursache für die bisher schwierige Bestimmung der Prävalenz war das Fehlen einer einheitlichen und verbindlichen Definition des Gestationsdiabetes samt seiner Bestimmung und Grenzwerte. Vor Kurzem wurde die aktuelle Leitlinie „GDM – Evidenzbasierte Leitlinie zu Diagnostik, Therapie und Nachsorge der Deutschen Diabetes-Gesellschaft (DDG) und der Deutschen Gesellschaft für Gynäkologie und Geburtshilfe (DGGG)“ veröffentlicht [10]. Diese empfiehlt eine einheitliche Definition des Gestationsdiabetes und einheitliche Grenzwerte im venösen Plasma nach den neuen Konsensus-Empfehlungen der International Association of Diabetes and Pregnancy Study Groups (IADPSG). Aus epidemiologischer und methodischer Sicht ist dabei zu begrüßen, dass ein vorbestehender und unerkannter Diabetes mellitus, der erstmals während der Schwangerschaft diagnostiziert wird, demnach nicht mehr unter die Diagnoseklasse des Gestationsdiabetes fällt [10]. Damit wird künftig ein erstmals in der

**Tab. 1** Prävalenz sowie adjustierte Odds Ratios für Gestationsdiabetes in Abhängigkeit von maternalen Risikofaktoren und soziodemografischen Charakteristika in der deutschen Perinatalstatistik 2006 [14].

| Variable                                    | n       | GDM  | OR (95%-KI)      |
|---------------------------------------------|---------|------|------------------|
| Parität                                     |         |      |                  |
| ▶ Nullipara                                 | 321 563 | 2,1% | 1,00 (Referenz)  |
| ▶ Multipara                                 | 325 822 | 2,5% | 0,83 (0,80–0,86) |
| Mehrlingsschwangerschaft                    |         |      |                  |
| ▶ nein                                      | 636 837 | 2,3% | 1,00 (Referenz)  |
| ▶ ja                                        | 10 548  | 2,9% | 1,13 (1,01–1,27) |
| Alter bei der Geburt des Kindes             |         |      |                  |
| ▶ < 20 Jahre                                | 18 175  | 0,7% | 1,00 (Referenz)  |
| ▶ 20 bis < 25 Jahre                         | 98 264  | 1,4% | 1,76 (1,47–2,12) |
| ▶ 25 bis < 30 Jahre                         | 186 818 | 2,0% | 2,56 (2,14–3,07) |
| ▶ 30 bis < 35 Jahre                         | 193 453 | 2,5% | 3,46 (2,89–4,15) |
| ▶ ≥ 35 Jahre                                | 150 676 | 3,3% | 4,69 (3,91–5,62) |
| BMI zu Beginn der Schwangerschaft           |         |      |                  |
| ▶ 20 bis < 25 kg/m <sup>2</sup>             | 305 438 | 1,7% | 1,00 (Referenz)  |
| ▶ < 20 kg/m <sup>2</sup>                    | 84 400  | 1,1% | 0,70 (0,65–0,75) |
| ▶ 25 bis < 30 kg/m <sup>2</sup>             | 128 644 | 3,0% | 1,80 (1,73–1,88) |
| ▶ 30 bis < 35 kg/m <sup>2</sup>             | 46 776  | 4,9% | 3,01 (2,86–3,17) |
| ▶ ≥ 35 kg/m <sup>2</sup>                    | 24 933  | 7,7% | 4,96 (4,70–5,24) |
| Gewichtszunahme während der Schwangerschaft |         |      |                  |
| < 20 kg                                     | 501 673 | 2,5% | 1,00 (Referenz)  |
| 20 bis < 25 kg                              | 61 904  | 1,6% | 0,75 (0,70–0,80) |
| 25 bis < 30 kg                              | 15 140  | 1,9% | 0,90 (0,80–1,01) |
| ≥ 30 kg                                     | 4 936   | 2,2% | 0,97 (0,80–1,17) |
| Tabakkonsum während der Schwangerschaft     |         |      |                  |
| ▶ Nichtraucherin                            | 473 048 | 2,2% | 1,00 (Referenz)  |
| ▶ 1 bis 5 Zigaretten pro Tag                | 20 921  | 2,3% | 1,18 (1,08–1,30) |
| ▶ 6 bis 10 Zigaretten pro Tag               | 25 181  | 2,2% | 1,11 (1,02–1,21) |
| ▶ 11 Zigaretten pro Tag und mehr            | 19 165  | 2,0% | 0,90 (0,81–1,00) |
| Nationalität der Mutter                     |         |      |                  |
| ▶ Deutsch                                   | 524 289 | 2,1% | 1,00 (Referenz)  |
| ▶ Osteuropäisch (früherer Ostblock)         | 34 154  | 2,5% | 1,37 (1,27–1,47) |
| ▶ Mittelmeerrainer                          | 20 906  | 2,8% | 1,43 (1,31–1,56) |
| ▶ andere Nationalität                       | 68 036  | 3,5% | 1,77 (1,69–1,86) |
| berufliche Stellung der Mutter              |         |      |                  |
| ▶ höhere Qualifizierung/Führungsaufgaben    | 77 036  | 2,1% | 1,00 (Referenz)  |
| ▶ gelernt/mittlere Qualifizierung           | 192 366 | 2,3% | 1,14 (1,07–1,21) |
| ▶ ungelern                                  | 21 079  | 2,5% | 1,16 (1,05–1,28) |
| ▶ Studentin/Auszubildende                   | 20 671  | 1,3% | 1,05 (0,92–1,20) |
| ▶ Hausfrau                                  | 220 653 | 2,6% | 1,21 (1,14–1,28) |
| Anzahl der Schwangerschaften gesamt         | 647 385 | 2,3% |                  |

BMI: Body-Mass-Index; GDM: Gestationsdiabetes mellitus; OR: Odds Ratio; KI: Konfidenzintervall

Schwangerschaft diagnostizierter Diabetes mellitus anderen Typs eindeutig und zuverlässig von Gestationsdiabetesfällen unterschieden. Der künftige Ausschluss manifester, vorbestehender Diabetesfälle aus der Definition des Gestationsdiabetes ist bei der Interpretation künftiger Prävalenzwerte auf Basis der neuen Leitlinie zu berücksichtigen.

Die bisher verfügbaren Daten zeigen einen ansteigenden Trend in der Prävalenz des Gestationsdiabetes in Deutschland, der sich in den nächsten Jahren weiter fortsetzen dürfte. Für diese Annahme sprechen mehrere Gründe: Zum einen liefern die projizierten Trends zentraler Risikofaktoren für Gestationsdiabetes plausible Erklärungen für einen Anstieg der Prävalenz über die letzten Jah-

re, wie z.B. ein zunehmendes Geburtsalter bei der Erstgeburt, eine ansteigende Adipositasprävalenz sowie die Zunahme von Mehrlingsschwangerschaften infolge vermehrter Kinderwunschbehandlungen [11–13]. Jeder dieser Faktoren erhöht das Risiko für einen Gestationsdiabetes deutlich, wie die Regressionsanalyse zeigen konnte. Zum anderen könnte ein Anstieg der Diagnosen aber auch durch einen breiteren Einsatz oraler Glukosetoleranztests und eine gesteigerte Symptomaufmerksamkeit bei Ärzten und werdenden Müttern bedingt sein.

### Fazit für die Praxis

Die vorliegende Studie zeigt, wie lückenhaft hierzulande noch immer unser Wissen um die Verbreitung des Gestationsdiabetes ist. Zwar lässt sich auf Basis der bundesweiten Perinatalstatistik belegen, dass die international bekannten Risikofaktoren auch unter deutschen Schwangeren in gleichem Maße bedeutsam und damit klinisch zu beachten sind. Dennoch bleibt in der aktuellen Situation eine valide Abschätzung der absoluten jährlichen Fallzahlen und des zeitlichen Trends aus folgenden Gründen schwierig. Erstens ist die Schätzung von einer standardisierten und lückenlosen Erfassung und Weiterleitung der Daten aus den Geburtskliniken abhängig. Zweitens erschwert die grundsätzlich zu begrüßende Änderung der diagnostischen Definition des Gestationsdiabetes Zeitvergleiche. Und drittens ist das Ausmaß unerkannter Fälle von Gestationsdiabetes (und vorbestehender Diabetesfälle) mit einer bis dato unbekanntem Dunkelziffer behaftet. Nur repräsentative Screening-Studien mit entsprechenden Vergleichsgruppen oder ein flächendeckendes Screening auf Gestationsdiabetes würden solche Daten liefern können. Gerade die Sinnhaftigkeit eines solchen flächendeckenden Screenings mittels oraler Glukosetoleranztests wurde lebhaft zwischen Gynäkologen, Diabetologen, Gesundheitspolitikern, Gesundheitsökonomen und Vertretern der Krankenkassen diskutiert und führte aktuell zur Ergänzung der Mutterschaftsrichtlinien. Vorbehaltlich der Prüfung durch das Bundesministerium für Gesundheit wird ein Screening auf Gestationsdiabetes künftig durch den Beschluss des GBA in die Mutterschafts-Richtlinien aufgenommen [3]. Somit wird bald jeder Schwangeren in Deutschland ohne manifesten Diabetes ein oGTT angeboten. Eine wissenschaftliche Begleitung dieser geänderten Situation sollte erfolgen, damit bald auch valide prospektive Daten zur Verfügung stehen. Unsere Studie möchte die Diskussion bereichern und bisherige epidemiologische Daten zur Verbreitung und Entwicklung sowie zu Risikogruppen des Gestationsdiabetes aufzeigen.

### Interessenkonflikt

Ein kleiner Teil dieser Studie wurde von der Roche Diagnostics Deutschland GmbH unterstützt.

### Literatur

- 1 Schäfer-Graf UM. Empfehlung zu Diagnostik und Therapie des Gestationsdiabetes (GDM). *Geburtsh Frauenheilk* 2004; 64: 125–133
- 2 Schmitter M. Gestationsdiabetes und Diabetes mellitus in der Schwangerschaft. *Geburtsh Frauenheilk* 2005; 65: R246–R272
- 3 Gemeinsamer Bundesausschuss. Beschluss des Gemeinsamen Bundesausschusses über eine Änderung der Richtlinien über die ärztliche Betreuung während der Schwangerschaft und nach der Entbindung (Mutterschafts-Richtlinien): Einführung eines Screenings auf Gestationsdiabetes (vom 15. Dezember 2011); Berlin: 2011

- 4 AQUA. Bundesauswertung zum Verfahrensjahr 2010. 16/1 Geburtshilfe. Göttingen: Institut für angewandte Qualitätsförderung und Forschung im Gesundheitswesen; 2011
- 5 BQS. Qualität sichtbar machen – BQS-Qualitätsreport: Geburtshilfe. Düsseldorf: Institut für Qualität und Patientensicherheit; 2007
- 6 RKI. KiGGS Kinder- und Jugendgesundheitsurvey 2003–2006. Public Use File. Berlin: Robert Koch-Institut; 2008
- 7 IQWiG. Screening auf Gestationsdiabetes. Köln: Institut für Qualität und Wirtschaftlichkeit im Gesundheitswesen; 2009
- 8 Hosler AS, Nayak SG, Radigan AM. Agreement between self-report and birth certificate for gestational diabetes mellitus: New York State PRAMS. *Matern Child Health J* 2010; 14: 786–789
- 9 Hunsberger M, Rosenberg KD, Donatelle RJ. Racial/ethnic disparities in gestational diabetes mellitus: findings from a population-based survey. *Womens Health Issues* 2010; 20: 323–328
- 10 Kleinwechter H, Schäfer-Graf U, Bühner C et al. Gestationsdiabetes mellitus. Evidenzbasierte Leitlinie zu Diagnostik, Therapie und Nachsorge. Kiel, Stuttgart, Berlin: Deutsche Diabetes-Gesellschaft und Deutsche Gesellschaft für Gynäkologie und Geburtshilfe; 2011
- 11 Mai R. Die Alten der Zukunft. Eine bevölkerungsstatistische Datenanalyse. Opladen: Leske & Budrich; 2003
- 12 Russell RB, Petrini JR, Damus K et al. The changing epidemiology of multiple births in the United States. *Obstet Gynecol* 2003; 101: 129–135
- 13 Hartge DR, Dawson A, Bohlmann MK et al. Die Schwangere über 25 (BMI) – Herausforderung in der antenatalen und peripartalen Überwachung. *Geburtsh Frauenheilk* 2010; 70: 463–471
- 14 Schneider S, Höft B, Freerksen N et al. Neonatal complications and risk factors among women with gestational diabetes mellitus. *Acta Obstet Gynecol Scand* 2010; 90: 231–237
